# Supplementary material
Source: PubMed Central journal article supplement (PMC3334838)

| Kinase ID                             | TAE684 | WZ-4-49-8 | HG-7-92-01 | HG-7-27-01 |
|---------------------------------------|--------|-----------|------------|------------|
| <i>Screening concentration ( μ M)</i> | 10     | 10        | 10         | 10         |
| AAK1                                  | 2.8    | 69        |            | 84         |
| ABL1                                  | 7.3    |           | 0.1        |            |
| ABL1(E255K)                           | 19     |           | 1.2        |            |
| ABL1(F317I)                           | 0.45   |           | 0.05       |            |
| ABL1(F317L)                           | 0.7    |           | 0.1        |            |
| ABL1(H396P)                           | 6.4    |           | 0.7        |            |
| ABL1(M351T)                           | 5      |           | 0.35       |            |
| ABL1(Q252H)                           | 2.2    |           | 0.4        |            |
| ABL1(T315I)                           | 0.1    |           | 0          |            |
| ABL1(Y253F)                           | 4.2    |           | 1.1        |            |
| ABL1(E255K)-phosphorylated            |        | 67        |            | 0.3        |
| ABL1(F317I)-nonphosphorylated         |        | 16        |            | 0          |
| ABL1(F317I)-phosphorylated            |        | 12        |            | 6.3        |
| ABL1(F317L)-nonphosphorylated         |        | 31        |            | 0          |
| ABL1(F317L)-phosphorylated            |        | 5.2       |            | 3.6        |
| ABL1(H396P)-nonphosphorylated         |        | 25        |            | 0          |
| ABL1(H396P)-phosphorylated            |        | 75        |            | 0          |
| ABL1(M351T)-phosphorylated            |        | 53        |            | 3.8        |
| ABL1(Q252H)-nonphosphorylated         |        | 35        |            | 0          |
| ABL1(Q252H)-phosphorylated            |        | 42        |            | 0.1        |
| ABL1(T315I)-nonphosphorylated         |        | 45        |            | 0          |
| ABL1(T315I)-phosphorylated            |        | 16        |            | 1.5        |
| ABL1(Y253F)-phosphorylated            |        | 61        |            | 0.1        |
| ABL1-nonphosphorylated                |        | 72        |            | 0          |
| ABL1-phosphorylated                   |        | 72        |            | 0          |
| ABL2                                  | 1.4    | 97        | 0.6        | 0.7        |
| ACVR1                                 | 0      | 60        |            | 100        |
| ACVR1B                                | 0.05   | 100       |            | 96         |
| ACVR2A                                | 12     | 100       |            | 100        |
| ACVR2B                                | 22     | 100       |            | 92         |
| ACVRL1                                | 1.7    | 100       |            | 79         |
| ADCK3                                 | 9.2    | 84        |            | 100        |
| ADCK4                                 | 0      | 29        |            | 93         |
| AKT1                                  | 40     | 100       |            | 100        |
| AKT2                                  | 40     | 100       |            | 46         |
| AKT3                                  | 40     | 100       |            | 81         |
| ALK                                   | 0.25   | 34        | 0.55       | 100        |
| AMPK-alpha1                           | 0.1    | 51        | 33         | 18         |

|               |      |     |      |     |
|---------------|------|-----|------|-----|
| AMPK-alpha2   | 0.15 | 100 |      | 14  |
| ANKK1         | 40   | 100 | 23   | 9.6 |
| ARK5          | 0.75 | 100 |      | 98  |
| ASK1          |      | 100 |      | 100 |
| ASK2          |      | 99  |      | 93  |
| AURKA         | 0    | 100 |      | 78  |
| AURKB         | 1    | 100 |      | 100 |
| AURKC         | 0.1  | 100 |      | 45  |
| AXL           | 0.1  | 100 |      | 26  |
| BIKE          | 2.8  | 47  |      | 100 |
| BLK           | 0.1  | 100 | 0.45 | 0.1 |
| BMPR1A        | 0    | 100 |      | 100 |
| BMPR1B        | 1.2  | 49  |      | 77  |
| BMPR2         | 40   | 85  |      | 100 |
| BMX           | 12   | 100 | 2.4  | 12  |
| BRAF          | 40   | 100 | 9.1  | 0.8 |
| BRAF(V600E)   | 40   | 98  | 4    | 0   |
| BRK           |      | 10  | 28   | 91  |
| BRSK1         | 1.2  | 100 |      | 91  |
| BRSK2         | 0.5  | 94  |      | 100 |
| BTK           | 0    | 32  |      | 0.2 |
| CAMK1         | 1.4  | 4.6 | 0    | 90  |
| CAMK1D        | 0.1  | 1   | 6.2  | 100 |
| CAMK1G        | 31   | 26  | 20   | 99  |
| CAMK2A        | 1.2  | 34  |      | 100 |
| CAMK2B        | 5.8  | 65  |      | 92  |
| CAMK2D        | 4.1  | 34  |      | 100 |
| CAMK2G        | 2    | 71  |      | 100 |
| CAMK4         | 0.5  | 1   |      | 100 |
| CAMKK1        | 0.2  | 46  |      | 98  |
| CAMKK2        | 0.1  | 46  | 28   | 95  |
| CASK          |      | 100 |      | 72  |
| CDC2L1        | 40   | 100 | 0.35 | 78  |
| CDC2L2        | 40   | 100 | 0.05 | 69  |
| CDC2L5        |      | 100 |      | 46  |
| CDK11         | 40   | 100 | 0.1  | 3.5 |
| CDK2          | 24   | 100 | 11   | 100 |
| CDK3          | 40   | 85  | 10   | 100 |
| CDK4-cyclinD1 |      | 82  |      | 100 |
| CDK4-cyclinD3 |      | 100 |      | 64  |
| CDK5          | 5.2  | 96  | 19   | 96  |

|          |      |     |      |      |
|----------|------|-----|------|------|
| CDK7     | 0.15 | 42  | 2.4  | 3    |
| CDK8     | 40   | 100 | 3.9  | 3.6  |
| CDK9     | 40   | 100 | 5.8  | 99   |
| CDKL1    |      | 100 |      | 61   |
| CDKL2    | 40   | 91  | 0.9  | 0.15 |
| CDKL3    |      | 100 |      | 0.55 |
| CDKL5    |      | 100 |      | 13   |
| CHEK1    | 0    | 100 |      | 82   |
| CHEK2    | 0    | 23  |      | 83   |
| CIT      | 40   | 100 | 0.1  | 0.2  |
| CLK1     | 0.4  | 0.4 |      | 29   |
| CLK2     | 0    | 2.2 |      | 86   |
| CLK3     | 3    | 50  |      | 100  |
| CLK4     | 1.2  | 5.2 |      | 31   |
| CSF1R    | 0    | 99  | 0    | 1.1  |
| CSK      | 2    | 100 | 0.45 | 0.55 |
| CSNK1A1  |      | 55  |      | 14   |
| CSNK1A1L | 40   | 78  |      | 99   |
| CSNK1D   | 40   | 92  |      | 95   |
| CSNK1E   | 40   | 74  |      | 100  |
| CSNK1G1  | 40   | 71  |      | 100  |
| CSNK1G2  | 40   | 46  |      | 96   |
| CSNK1G3  | 40   | 50  |      | 100  |
| CSNK2A1  | 27   | 100 |      | 89   |
| CSNK2A2  | 40   | 94  |      | 72   |
| CTK      |      | 100 |      | 100  |
| DAPK1    | 6.4  | 60  |      | 85   |
| DAPK2    | 12   | 64  |      | 66   |
| DAPK3    | 4.5  | 83  |      | 91   |
| DCAMKL1  | 0    | 5.2 |      | 97   |
| DCAMKL2  | 0    | 19  |      | 100  |
| DCAMKL3  | 0    | 100 |      | 87   |
| DDR1     | 0.05 | 100 | 0.05 | 0    |
| DDR2     | 14   | 93  | 5.1  | 0    |
| DLK      | 0    | 100 |      | 18   |
| DMPK     | 1.8  | 70  |      | 100  |
| DMPK2    | 23   | 100 |      | 100  |
| DRAK1    | 5.9  | 100 |      | 11   |
| DRAK2    | 40   | 100 |      | 2    |
| DYRK1A   |      | 63  |      | 44   |
| DYRK1B   | 40   | 42  |      | 76   |

|                           |            |            |            |            |
|---------------------------|------------|------------|------------|------------|
| DYRK2                     |            | 90         |            | 74         |
| EGFR                      | 0.1        | 4.1        | 5.6        | 12         |
| EGFR(E746-A750del)        | 0          | 20         | 8.4        | 17         |
| EGFR(G719C)               | 9.9        | 81         | 12         | 1.8        |
| EGFR(G719S)               | 9.6        | 100        | 14         | 5.4        |
| EGFR(L747-E749del, A750P) | 0          | 10         | 1.5        | 2.9        |
| EGFR(L747-S752del, P753S) | 0.95       | 40         | 1.2        | 0.2        |
| EGFR(L747-T751del,Sins)   | 0.6        | 19         | 1.1        | 4.6        |
| EGFR(L858R)               | 0.1        | 6.6        | 14         | 3.4        |
| EGFR(L858R,T790M)         |            | 25         |            | 65         |
| EGFR(L861Q)               | 0.15       | 7.7        | 15         | 0.85       |
| EGFR(S752-I759del)        | 1.4        | 49         | 4.6        | 6.2        |
| EGFR(T790M)               |            | 0.25       |            | 9.4        |
| EIF2AK1                   |            | 100        |            | 100        |
| EPHA1                     | 0.15       | 100        |            | 10         |
| EPHA2                     | 27         | 100        | 3.1        | 5.4        |
| EPHA3                     | 40         | 100        | 3.4        | 4.4        |
| EPHA4                     | 30         | 100        | 5.8        | 16         |
| EPHA5                     | 21         | 100        | 11         | 20         |
| EPHA6                     | 3.1        | 100        |            | 51         |
| EPHA7                     | 0.4        | 100        |            | 76         |
| EPHA8                     | 40         | 100        | 0.1        | 0.35       |
| EPHB1                     | 0.1        | 100        |            | 16         |
| EPHB2                     | 33         | 100        | 11         | 5.7        |
| EPHB3                     | 18         | 100        |            | 100        |
| EPHB4                     | 17         | 99         |            | 23         |
| EPHB6                     |            | 71         |            | 1.6        |
| ERBB2                     | 8          | 37         |            | 0          |
| ERBB3                     |            | 55         |            | 100        |
| ERBB4                     | 1.2        | 7.8        | 28         | 7          |
| ERK1                      | 0.1        | 0.75       |            | 94         |
| ERK2                      | 0.3        | 0.7        |            | 100        |
| ERK3                      | 40         | 94         |            | 100        |
| ERK4                      | 40         | 100        |            | 100        |
| ERK5                      | 0          | 0.9        |            | 100        |
| ERK8                      | 0.25       | 100        |            | 100        |
| ERN1                      |            | 92         |            | 71         |
| FAK                       |            | 0.2        | 23         | 100        |
| FER                       | 0.05       | 9.1        | 0.5        | 78         |
| <b>FES</b>                | <b>0.3</b> | <b>3.6</b> | <b>2.2</b> | <b>9.4</b> |
| FGFR1                     | 0          | 100        | 1.7        | 1.6        |

|                       |      |      |      |      |
|-----------------------|------|------|------|------|
| FGFR2                 | 0.95 | 100  | 1.4  | 10   |
| FGFR3                 | 2.6  | 94   | 9.4  | 12   |
| FGFR3(G697C)          | 0.25 | 97   | 16   | 23   |
| FGFR4                 | 0    | 100  | 0.45 | 34   |
| FGR                   | 2.8  | 82   | 1.2  | 4.5  |
| FLT1                  | 2.8  | 100  | 1.6  | 27   |
| FLT3                  | 0.05 | 100  | 0.15 | 3.8  |
| FLT3(D835H)           | 0.05 | 74   | 1.2  | 2.4  |
| FLT3(D835Y)           | 0.05 | 59   | 14   | 3.2  |
| FLT3(ITD)             | 0    | 100  | 0.7  | 5.6  |
| FLT3(K663Q)           | 0.3  | 100  | 0    | 0.15 |
| FLT3(N841I)           | 0.45 | 100  | 0    | 0    |
| FLT3(R834Q)           |      | 100  |      | 8.6  |
| FLT4                  | 0.05 | 100  | 0.2  | 26   |
| FRK                   | 0.2  | 18   | 0.7  | 7    |
| FYN                   | 5.6  | 100  | 1.6  | 4.6  |
| GAK                   | 0.1  | 6    | 31   | 51   |
| GCN2(Kin.Dom.2,S808G) | 4.5  | 100  |      | 0.8  |
| GRK1                  |      | 98   |      | 100  |
| GRK4                  |      | 92   |      | 80   |
| GRK7                  |      | 100  |      | 73   |
| GSK3A                 | 40   | 100  |      | 81   |
| GSK3B                 | 40   | 84   |      | 100  |
| HCK                   | 0.35 | 100  | 0.4  | 0.4  |
| HIPK1                 | 40   | 82   | 6.2  | 34   |
| HIPK2                 |      | 89   |      | 49   |
| HIPK3                 |      | 79   |      | 48   |
| HIPK4                 |      | 44   |      | 15   |
| HPK1                  |      | 54   | 1.6  | 0    |
| HUNK                  |      | 100  |      | 93   |
| ICK                   |      | 89   |      | 71   |
| IGF1R                 | 0    | 0.25 |      | 87   |
| IKK-alpha             | 40   | 100  | 0.95 | 0    |
| IKK-beta              | 40   | 100  | 24   | 0.95 |
| IKK-epsilon           | 25   | 100  |      | 90   |
| INSR                  | 0    | 0.3  | 30   | 65   |
| INSRR                 | 0.35 | 0.4  | 23   | 44   |
| IRAK1                 |      | 93   |      | 50   |
| IRAK3                 | 0.15 | 100  |      | 87   |
| IRAK4                 |      | 87   |      | 77   |
| ITK                   | 0.1  | 40   |      | 86   |

|                              |      |      |      |      |
|------------------------------|------|------|------|------|
| JAK1(Kin.Dom.1)              | 4.2  |      | 11   |      |
| JAK1(Kin.Dom.2)              | 4.7  |      |      |      |
| JAK2(Kin.Dom.2)              | 2    |      | 11   |      |
| JAK3(Kin.Dom.2)              | 0    |      | 2.4  |      |
| JAK1(JH1domain-catalytic)    |      | 100  |      | 80   |
| JAK1(JH2domain-pseudokinase) |      | 1.3  |      | 94   |
| JAK2(JH1domain-catalytic)    |      | 50   |      | 29   |
| JAK3(JH1domain-catalytic)    |      | 84   |      | 3.2  |
| JNK1                         | 5.2  | 4.3  | 0    | 24   |
| JNK2                         | 12   | 22   | 0    | 0.7  |
| JNK3                         | 2.6  | 7.2  | 12   | 54   |
| KIT                          | 0.1  | 87   | 0    | 0.15 |
| KIT(A829P)                   |      | 100  |      | 33   |
| KIT(D816H)                   |      | 73   |      | 20   |
| KIT(D816V)                   | 3.1  | 74   | 10   | 25   |
| KIT(L576P)                   |      | 67   |      | 0.2  |
| KIT(V559D)                   | 0.1  | 86   | 0    | 0.05 |
| KIT(V559D,T670I)             | 0.95 | 100  | 0.05 | 14   |
| KIT(V559D,V654A)             | 7.4  | 100  | 2.7  | 3.7  |
| LATS1                        | 32   | 100  |      | 55   |
| LATS2                        | 17   | 88   | 13   | 36   |
| LCK                          | 0.1  | 84   | 0.8  | 0.45 |
| LIMK1                        | 2.2  | 100  |      | 15   |
| LIMK2                        | 6.5  | 51   |      | 9.6  |
| LKB1                         | 40   | 100  |      | 76   |
| LOK                          | 0    | 100  | 0    | 0    |
| LRRK2                        |      | 0.65 |      | 63   |
| LRRK2(G2019S)                |      | 4.8  |      | 75   |
| LTK                          | 0    | 1.7  | 1.2  | 100  |
| LYN                          | 5    | 100  | 0.75 | 1    |
| LZK                          |      | 100  |      | 6.6  |
| MAK                          |      | 100  |      | 49   |
| MAP3K1                       |      | 82   |      | 75   |
| MAP3K15                      |      | 77   |      | 100  |
| MAP3K2                       |      | 28   |      | 0.4  |
| MAP3K3                       | 2.8  | 69   | 12   | 0.3  |
| MAP3K4                       | 13   | 100  |      | 2.5  |
| MAP3K5                       | 40   |      |      |      |
| MAP4K1                       | 3.2  |      |      |      |
| MAP4K2                       | 9.4  | 97   | 0.3  | 0.1  |

|             |      |     |     |      |
|-------------|------|-----|-----|------|
| MAP4K3      | 2.5  | 10  | 18  | 0.9  |
| MAP4K4      | 5.4  | 100 | 0   | 0.1  |
| MAP4K5      | 0.3  | 58  | 11  | 0.55 |
| MAPKAPK2    | 40   | 100 |     | 100  |
| MAPKAPK5    | 40   | 100 |     | 80   |
| MARK1       | 0    | 100 |     | 100  |
| MARK2       | 4.6  | 86  |     | 100  |
| MARK3       | 3.2  | 100 |     | 58   |
| MARK4       | 0    | 71  |     | 100  |
| MAST1       |      | 46  |     | 87   |
| MEK1        | 3.6  | 100 |     | 35   |
| MEK2        | 1.8  | 94  |     | 11   |
| MEK3        | 0.8  | 7   |     | 100  |
| MEK4        | 1.6  | 8.2 |     | 100  |
| MEK5        |      | 55  |     | 0.1  |
| MEK6        | 40   | 100 |     | 100  |
| MELK        | 0.95 | 92  |     | 25   |
| MERTK       | 0    | 100 |     | 31   |
| MET         | 0    | 100 |     | 78   |
| MET(M1250T) |      | 100 |     | 89   |
| MET(Y1235D) |      | 100 |     | 93   |
| MINK        | 40   | 71  |     | 4.3  |
| MKK7        |      | 78  |     | 30   |
| MKNK1       | 40   | 53  |     | 89   |
| MKNK2       | 1.4  | 100 | 4.2 | 18   |
| MLCK        | 40   | 100 |     | 59   |
| MLK1        | 0.35 | 94  |     | 21   |
| MLK2        | 4.6  | 100 |     | 30   |
| MLK3        | 20   | 100 | 25  | 10   |
| MRCKA       | 40   | 100 |     | 100  |
| MRCKB       | 25   | 100 |     | 100  |
| MST1        | 4.1  | 100 |     | 22   |
| MST1R       | 3    | 100 |     | 85   |
| MST2        | 0.25 | 100 |     | 100  |
| MST3        | 24   | 82  | 31  | 30   |
| MST4        | 27   | 100 |     | 4.6  |
| MTOR        |      | 86  |     | 100  |
| MUSK        | 0.35 | 100 | 0.2 | 5.2  |
| MYLK        | 0.5  | 0.9 |     | 67   |
| MYLK2       | 40   | 100 | 8.4 | 3.8  |
| MYLK4       |      | 100 |     | 100  |

|                       |      |      |      |     |
|-----------------------|------|------|------|-----|
| MYO3A                 | 0.25 | 38   | 6.4  | 60  |
| MYO3B                 | 0.6  | 18   | 4.8  | 67  |
| NDR1                  |      | 98   |      | 79  |
| NDR2                  | 7.3  | 100  | 6.8  | 84  |
| NEK1                  | 40   | 100  |      | 91  |
| NEK11                 |      | 100  |      | 40  |
| NEK2                  | 2.5  | 100  |      | 100 |
| NEK3                  |      | 76   |      | 59  |
| NEK4                  |      | 74   |      | 28  |
| NEK5                  | 40   | 100  |      | 49  |
| NEK6                  | 1.8  | 100  |      | 100 |
| NEK7                  | 3.8  | 100  |      | 100 |
| NEK9                  | 3.3  | 100  |      | 27  |
| NIM1                  |      | 100  |      | 100 |
| NLK                   | 40   | 97   | 14   | 65  |
| OSR1                  |      | 0.05 |      | 76  |
| p38-alpha             | 40   | 98   | 0    | 4.6 |
| p38-beta              | 40   | 100  | 0    | 3.2 |
| p38-delta             | 40   | 100  | 0.55 | 83  |
| p38-gamma             | 40   | 100  | 0    | 39  |
| PAK1                  | 4.8  | 90   |      | 87  |
| PAK2                  | 30   | 82   |      | 69  |
| PAK3                  | 0.85 | 59   |      | 14  |
| PAK4                  | 9.6  | 85   |      | 100 |
| PAK6                  | 13   | 100  |      | 91  |
| PAK7                  |      | 80   |      | 100 |
| PAK7/PAK5             | 2.7  |      |      |     |
| PCK1                  | 2.2  | 98   | 11   | 60  |
| PCK2                  | 9.9  | 100  | 0.1  | 60  |
| PCK3                  | 40   | 100  | 1.8  | 81  |
| PDGFRA                | 0.85 | 100  | 0.6  | 2.8 |
| PDGFRB                | 0.25 | 69   | 0    | 0   |
| PDPK1                 | 28   | 100  |      | 100 |
| PFCDPK1(P.falciparum) |      | 44   |      | 0.2 |
| PFPK5(P.falciparum)   |      | 100  |      | 55  |
| PFTAIRE2              | 16   | 100  | 6    | 53  |
| PFTK1                 | 40   | 100  | 0.4  | 88  |
| PHKG1                 | 0.1  | 24   |      | 100 |
| PHKG2                 | 0    | 21   |      | 100 |
| PIK3C2B               | 40   | 100  |      | 79  |
| PIK3C2G               |      | 100  |      | 87  |



|                      |      |     |    |     |
|----------------------|------|-----|----|-----|
| PIK3CA               | 40   | 99  |    | 92  |
| PIK3CA(C420R)        |      | 100 |    | 80  |
| PIK3CA(E542K)        |      | 100 |    | 94  |
| PIK3CA(E545A)        |      | 100 |    | 100 |
| PIK3CA(E545K)        | 40   | 100 |    | 100 |
| PIK3CA(H1047L)       |      | 100 |    | 97  |
| PIK3CA(H1047Y)       |      | 100 |    | 68  |
| PIK3CA(I800L)        |      | 100 |    | 94  |
| PIK3CA(M1043I)       |      | 100 |    | 73  |
| PIK3CA(Q546K)        |      | 100 |    | 100 |
| PIK3CB               | 40   | 17  |    | 85  |
| PIK3CD               | 40   | 100 |    | 50  |
| PIK3CG               | 40   | 100 |    | 100 |
| PIK4CB               |      | 58  |    | 63  |
| PIM1                 | 40   | 100 |    | 76  |
| PIM2                 | 40   | 100 |    | 50  |
| PIM3                 | 40   | 100 |    | 55  |
| PIP5K1A              | 1.3  | 39  |    | 86  |
| PIP5K1C              |      | 82  |    | 65  |
| PIP5K2B              | 11   | 100 |    | 83  |
| PIP5K2C              |      | 100 |    | 61  |
| PKAC-alpha           | 11   | 100 | 25 | 26  |
| PKAC-beta            | 9.9  | 100 | 14 | 90  |
| PKMYT1               | 40   | 69  |    | 100 |
| PKN1                 | 0.5  | 100 |    | 100 |
| PKN2                 | 3.2  | 100 |    | 100 |
| PKNB(M.tuberculosis) |      | 75  |    | 100 |
| PLK1                 | 0.1  | 47  |    | 100 |
| PLK2                 |      | 100 |    | 69  |
| PLK3                 | 0    | 98  |    | 83  |
| PLK4                 | 0    | 74  |    | 92  |
| PRKCD                | 28   | 100 |    | 100 |
| PRKCE                | 16   | 62  | 20 | 68  |
| PRKCH                | 40   | 100 | 26 | 100 |
| PRKCI                |      | 100 |    | 74  |
| PRKCQ                | 13   | 100 |    | 81  |
| PRKD1                | 1    | 73  |    | 90  |
| PRKD2                | 0.05 | 96  | 29 | 76  |
| PRKD3                | 0    | 36  |    | 71  |
| PRKG1                | 1.3  | 100 |    | 100 |

|                            |      |     |     |      |
|----------------------------|------|-----|-----|------|
| PRKG2                      | 7.6  | 100 |     | 88   |
| PRKR                       | 40   | 100 |     | 80   |
| PRKX                       | 28   | 100 |     | 100  |
| PRP4                       |      | 100 |     | 85   |
| PTK2                       | 0    |     |     |      |
| PTK2B                      | 0    |     |     |      |
| PTK6                       | 0.15 |     |     |      |
| PYK2                       |      | 5   | 2.1 | 36   |
| QSK                        |      | 100 |     | 100  |
| RAF1                       | 40   | 100 | 7   | 43   |
| RET                        | 0    | 100 | 0   | 0.15 |
| RET(M918T)                 | 0.05 | 100 | 0   | 0.2  |
| RET(V804L)                 | 0.25 | 82  | 0.8 | 1.2  |
| RET(V804M)                 | 0.5  | 100 | 1   | 0.15 |
| RIOK1                      | 2.6  | 100 |     | 100  |
| RIOK2                      | 5.3  | 76  |     | 85   |
| RIOK3                      | 3.2  | 88  |     | 78   |
| RIPK1                      | 18   | 100 | 0   | 2.7  |
| RIPK2                      | 40   | 100 | 9.8 | 5.4  |
| RIPK4                      | 40   | 76  |     | 17   |
| RIPK5                      |      | 2.8 |     | 69   |
| ROCK1                      |      | 4.8 |     | 100  |
| ROCK2                      | 0.95 | 25  |     | 51   |
| ROS1                       | 0.45 | 5.8 |     | 100  |
| RPS6KA1(Kin.Dom.1)         | 0.25 |     |     |      |
| RPS6KA1(Kin.Dom.2)         | 10   |     |     |      |
| RPS6KA2(Kin.Dom.1)         | 0.05 |     |     |      |
| RPS6KA2(Kin.Dom.2)         | 6.2  |     |     |      |
| RPS6KA3(Kin.Dom.1)         | 0.55 |     |     |      |
| RPS6KA4(Kin.Dom.1)         | 4.4  | 100 | 3.3 | 100  |
| RPS6KA4(Kin.Dom.2)         | 40   | 97  |     | 43   |
| RPS6KA5(Kin.Dom.1)         | 40   | 100 | 4.7 | 100  |
| RPS6KA5(Kin.Dom.2)         | 40   | 100 |     | 73   |
| RPS6KA6(Kin.Dom.1)         | 1.1  |     |     |      |
| RPS6KA6(Kin.Dom.2)         | 1.8  |     |     |      |
| RSK1(Kin.Dom.1-N-terminal) |      | 1.8 |     | 100  |
| RSK1(Kin.Dom.2-C-terminal) |      | 14  |     | 13   |
| RSK2(Kin.Dom.1-N-terminal) |      | 2   |     | 43   |
| RSK3(Kin.Dom.1-N-terminal) |      | 77  |     | 69   |
| RSK3(Kin.Dom.2-C-terminal) |      | 7.4 |     | 43   |

|                            |      |     |      |      |
|----------------------------|------|-----|------|------|
| RSK4(Kin.Dom.1-N-terminal) |      | 23  |      | 100  |
| RSK4(Kin.Dom.2-C-terminal) |      | 2.1 |      | 11   |
| S6K1                       |      | 100 |      | 6.2  |
| SBK1                       |      | 57  |      | 82   |
| SgK085                     | 40   |     |      |      |
| SgK110                     | 0    | 100 |      | 100  |
| SGK3                       |      | 92  |      | 80   |
| SIK                        |      | 100 | 5.3  | 3.6  |
| SIK2                       |      | 85  |      | 61   |
| SLK                        | 0.1  | 14  | 2    | 2.4  |
| SNARK                      | 0    | 27  |      | 81   |
| SNF1LK                     | 0    |     |      |      |
| SNF1LK2                    | 7.5  |     |      |      |
| SNRK                       |      | 40  |      | 84   |
| SRC                        | 0.2  | 69  | 0.2  | 0.25 |
| SRMS                       | 0    | 27  | 4.6  | 8.2  |
| SRPK1                      | 2.2  | 100 |      | 77   |
| SRPK2                      | 12   | 100 |      | 100  |
| SRPK3                      | 1.7  | 100 |      | 82   |
| STK16                      | 2.8  | 76  |      | 100  |
| STK33                      | 0.1  | 15  |      | 90   |
| STK35                      | 16   | 100 | 3    | 57   |
| STK36                      | 5.8  | 100 | 0.2  | 0.1  |
| STK39                      |      | 37  |      | 100  |
| SYK                        | 3.4  | 100 | 6.2  | 15   |
| TAK1                       | 2.2  | 59  | 0.15 | 0.75 |
| TAOK1                      | 0.1  | 33  | 3    | 7    |
| TAOK2                      |      | 66  |      | 5.7  |
| TAOK3                      | 0.1  | 36  | 0.15 | 0    |
| TBK1                       |      | 100 |      | 96   |
| TEC                        | 0.7  | 98  |      | 24   |
| TESK1                      | 40   | 100 |      | 23   |
| TGFBR1                     | 0.2  | 95  |      | 99   |
| TGFBR2                     | 2.7  | 100 |      | 54   |
| TIE1                       | 0    | 76  | 0.95 | 2.8  |
| TIE2                       | 0    | 100 | 0    | 0    |
| TLK1                       | 40   | 75  |      | 100  |
| TLK2                       | 40   | 100 |      | 100  |
| TNIK                       | 12   | 87  | 8.2  | 1.9  |
| TNK1                       | 0.45 | 2.4 | 0.35 | 13   |

|                              |      |     |      |      |
|------------------------------|------|-----|------|------|
| TNK2                         | 0    | 3.4 |      | 32   |
| TNNI3K                       | 15   | 100 | 4.8  | 12   |
| TRKA                         | 12   | 72  | 27   | 0.45 |
| TRKB                         | 8.4  | 59  | 9.6  | 1    |
| TRKC                         | 40   | 54  | 3.8  | 1    |
| TRPM6                        |      | 100 |      | 67   |
| TSSK1B                       |      | 92  |      | 100  |
| TSSK1                        | 0    |     |      |      |
| TTK                          | 0    | 6.5 | 24   | 85   |
| TXK                          | 6.9  | 100 | 12   | 4    |
| TYK2(JH1domain-catalytic)    |      | 87  |      | 29   |
| TYK2(JH2domain-pseudokinase) |      | 63  |      | 100  |
| TYK2(Kin.Dom.1)              | 11   |     | 0    |      |
| TYK2(Kin.Dom.2)              | 0.45 |     |      |      |
| TYRO3                        | 24   | 100 |      | 37   |
| ULK1                         | 0.1  | 1.8 |      | 83   |
| ULK2                         | 1.1  | 3.4 |      | 32   |
| ULK3                         | 0    | 100 | 0.1  | 1.6  |
| VEGFR2                       | 2.2  | 100 | 1.5  | 37   |
| VRK2                         |      | 68  |      | 62   |
| WEE1                         | 17   | 100 |      | 100  |
| WEE2                         | 40   | 100 |      | 83   |
| YANK1                        |      | 32  |      | 100  |
| YANK2                        | 0.2  | 64  |      | 100  |
| YANK3                        | 3.1  | 88  |      | 96   |
| YES                          | 0.1  | 84  | 1.6  | 1.4  |
| YSK1                         | 40   | 95  |      | 35   |
| YSK4                         |      | 100 |      | 0    |
| ZAK                          | 40   | 100 | 0.35 | 1.2  |
| ZAP70                        | 10   | 32  | 9.8  | 15   |

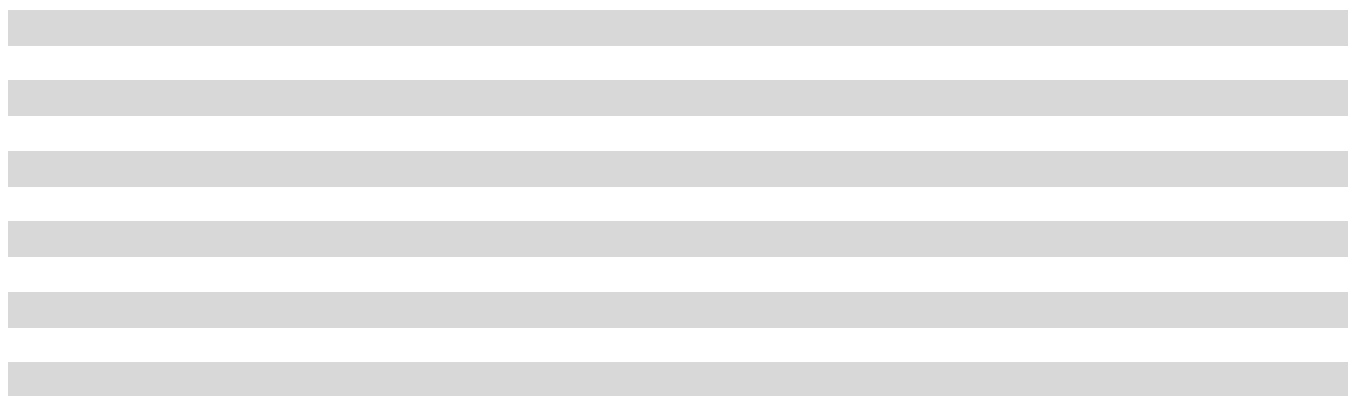

Supplement: NIHMS361424-supplement-02.pdf [file NIHMS361424-supplement-02.pdf]
